# Supplementary material for: Comparative analysis of affected and unaffected areas of systemic sclerosis skin biopsies by high-throughput proteomic approaches
Source: Arthritis Res Ther. 2020 May 7;22:107. doi: 10.1186/s13075-020-02196-x (PMC7206756; doi:10.1186/s13075-020-02196-x)
Supplement: Supplementary file 1 — Additional file 1. MRM transitions used for the selected proteins analysis. This table shows the selected proteins/peptides for validation and the instrumental parameters used for peptide monitoring. Peptides highlighted in bold were used as the quantitative reference whereas the remaining peptides were used as qualitative references. [file 13075_2020_2196_MOESM1_ESM.xlsx]

## Sheet: File 1
Protein accession	Gene name	Peptide sequence	MW	Precursor m/z (Da)	Products m/z (Da) and fragment ion		Collision Energy (V)	Cone Voltage (V)	Retention time (mins)
P05090	APOD	VLNQELR	870.51	436.25++	659.35	y5+	15	35	28.35
					545.3	y4+
					288.2	y2+
		NILTSNNIDVK	1229.68	615.84++	1003.54	y9+	22	35	41.4
					890.46	y8+
					789.41	y7+
P43897	TSFM	GFLNSSELSGLPAGPDR	1715.86	858.93++	782.42	y8+	31	35	55.5
					612.31	y6+
					444.22	y4+
		TNLEDVGR	902.46	452.23++	688.36	y6+	16	35	29.6
					575.28	y5+
					446.24	y4+
		LGQHVVGMAPLSVGSLDDEPGGEAETK	2692.32	898.44+++	1147.47	y11+	31	35	51.8
					1032.45	y10+
					788.38	y8+
P62266	RPS23	AHLGTALK	809.49	405.75++	602.39	y6+	14	35	41.5
					489.3	y5+
					147.11	y1+
		VANVSLLALYK	1189.72	595.86++	1020.61	y9+	21	35	55.2
					807.5	y7+
					494.3	y4+
P30740	SERPINB1	TYNFLPEFLVSTQK	1685.88	843.94++	1161.65	y10+	30	35	68.5
					1048.57	y9+
					463.25	y4+
		TYGADLASVDFQHASEDAR	2051.93	1026.97++	1361.61	y12+	37	35	46.4
					1175.51	y10+
					1060.48	y9+
		LGVQDLFNSSK	1206.64	604.32++	938.46	y8+	21	35	50.5
					810.4	y7+
					582.29	y5+
P09936	UCHL1	LGVAGQWR	885.5	443.75++	773.41	y7+	15	35	35.5
					617.32	y5+
					546.28	y4+
		LGFEDGSVLK	1063.57	532.78++	894.46	y8+	19	35	50
					747.39	y7+
					618.35	y6+
		NEAIQAAHDAVAQEGQC[+57.021464]R	1966.91	984.45++	1270.56	y11+	35	35	36
					1018.47	y9+
					848.37	y7+
P02743	APCS	VGEYSLYIGR	1155.61	578.8++	871.47	y7+	20	35	60
					708.4	y6+
					508.29	y4+
		IVLGQEQDSYGGK	1392.7	697.35++	1181.54	y11+	25	35	34.75
					1068.46	y10+
					883.38	y8+
Q53GQ0	HSD17B12	TIAVDFASEDIYDK	1585.77	793.88++	1372.63	y12+	28	35	54.75
					1202.52	y10+
					869.39	y7+
		GVFVQSVLPYFVATK	1653.93	827.96++	1124.64	y10+	30	35	69.5
					1037.6	y9+
					938.53	y8+
Q08752	PPID	VFFDVDIGGER	1252.62	627.31++	1007.48	y9+	22	35	57.3
					646.32	y6+
					418.2	y4+
		IVLELFADIVPK	1355.82	678.91++	789.45	y7+	24	35	76.5
					343.23	y3+
					244.17	y2+
		ILLITEDLK	1056.66	529.33++	831.48	y7+	19	35	53.9
					718.4	y6+
					605.31	y5+
Q8NHQ9	DDX55	DVAAEAVTGSGK	1103.56	552.78++	890.46	y10+	19	35	29.7
					819.42	y9+
					748.38	y8+
		SLDVLVLDEADR	1343.71	672.85++	817.41	y7+	24	35	70.3
					718.34	y6+
					605.25	y5+
		TGLFSATQTQEVENLVR	1891.98	946.99++	1316.68	y11+	34	35	61.75
					1087.57	y9+
					630.36	y5+
P14854	COX6B1	NC[+57.021464]WQNYLDFHR	1551.68	776.84++	964.46	y7+	28	35	48.9
					574.27	y4+
					459.25	y3+
		GGDISVC[+57.021464]EWYQR	1468.66	735.33++	1127.49	y8+	26	35	47
					941.39	y6+
					466.24	y3+
Q99504	EYA3	LSSGDPSTSPSLSQTTPSKDTDDQSR	2693.25	898.75+++	1148.5	y10+	31	35	33.4
					836.34	y7+
					505.24	y4+
		VLLYGLGEIFPIENIYSATK	2239.24	747.41+++	1135.6	y10+	26	35	83.25
					796.42	y7+
					569.29	y5+
Q9Y262	EIF3L	VYEIQDIYENSWTK	1786.86	894.43++	1283.6	y10+	32	35	58.5
					1155.53	y9+
					927.42	y7+
		VFSDEVQQQAQLSTIR	1847.95	924.98++	1172.64	y10+	33	35	47
					589.37	y5+
					476.28	y4+
		LAGFLDLTEQEFR	1537.79	769.9++	1150.57	y9+	27	35	70
					1037.49	y8+
					809.38	y6+
Q15154	PCM1	INFSDLDQR	1106.55	554.27++	646.32	y5+	19	35	42.5
					733.35	y6+
					880.42	y7+
		LPEMEPLVPR	1179.65	590.82++	581.38	y5+	21	35	50
					841.46	y7+
					970.5	y8+
		ALYALQDIVSR	1247.7	624.85++	717.39	y6+	22	35	54.25
					830.47	y7+
					901.51	y8+
