# Supplementary material for: Comparative analysis of affected and unaffected areas of systemic sclerosis skin biopsies by high-throughput proteomic approaches
Source: Arthritis Res Ther. 2020 May 7;22:107. doi: 10.1186/s13075-020-02196-x (PMC7206756; doi:10.1186/s13075-020-02196-x)
Supplement: Supplementary file 2 — Additional file 2. Clinical features of patients with SSc and histological features of SSc skin biopsy samples. [file 13075_2020_2196_MOESM2_ESM.xlsx]

## Sheet: File 2
											Histological features
								Autoantibodies			Samples from unaffected areas			Samples from affected area
Sample Number	Gender	Age	Subtype	Disease duration (months)	Rodnan Skin Score	Lung CT	DLCO (%)	ANA	ACA	Scl70	Collagen bundles	Inflammatory cells	Perivascular fibroblastic densification	Collagen bundles	Inflammatory cells	Perivascular fibroblastic densification
10	Female	38	lcSSc	10	8	NSIP	62	640	+	-	2	1	+	2	2	+
12	Female	53	dcSSc	24	10	N/A	77	320	-	-	2	1	+	3	2	+
13	Male	45	dcSSc	143	13	NSIP	41	640	-	+	2	1	-	3	2	+
14	Female	58	dcSSc	180	29	N/A	56	2560	+	-	2	2	-	2	2	-
16	Female	50	dcSSc	31	17	NSIP	65	1280	-	+	1	1	-	2	2	+
18	Male	32	dcSSc	3	14	NSIP	56	160	-	-	2	1	-	3	3	-
20	Female	81	lcSSc	200	10	NSIP	49	1280	-	+	1	2	-	3	3	+
NSIP; Nonspecific Interstitial Pneumonia
DLCO; Diffusing capacity for carbon monoxide
ANA, Antinuclear autoantibodies
ACA, Anti-centromere autoantibodies
Scl70, Anti-Scl-70 Antibodies
+ , present
- , absent
